# The AF4-MLL fusion transiently augments multilineage hematopoietic engraftment but is not sufficient to initiate leukemia in cord blood CD34<sup>+</sup> cells

Cristina Prieto<sup>1</sup>, Rolf Marschalek<sup>2</sup>, Alessa Kühn<sup>2</sup>, Adelheid Bursen<sup>2</sup>, Clara Bueno<sup>1,3</sup> and Pablo Menéndez<sup>1,3,4</sup>

<sup>1</sup> Department of Biomedicine, Josep Carreras Leukemia Research Institute, School of Medicine, University of Barcelona, Barcelona, Spain

<sup>2</sup> Institute of Pharmaceutical Biology/DCAL, Goethe-University, Frankfurt, Germany

<sup>3</sup> Centro de Investigación Biomédica en Red de Cáncer (CIBERONC), Barcelona, Spain

<sup>4</sup> Institució Catalana de Recerca i Estudis Avançats, Barcelona, Spain

**Correspondence to:** Pablo Menéndez, **email:** pmenendez@carrerasresearch.org

Clara Bueno, **email:** cbueno@carrerasresearch.org

**Keywords:** AF4-MLL, CD34 HSPCs, B cell acute lymphoblastic leukemia, leukemogenesis

**Received:** April 19, 2017

**Accepted:** April 22, 2017

**Published:** July 26, 2017

Copyright: Prieto et al. This is an open-access article distributed under the terms of the Creative Commons Attribution License 3.0 (CC BY 3.0), which permits unrestricted use, distribution, and reproduction in any medium, provided the original author and source are credited.

## ABSTRACT

The translocation t(4;11)(q21;q23) is the hallmark genetic abnormality associated with infant pro-B acute lymphoblastic leukemia (B-ALL) and has the highest frequency of rearrangement in Mixed-lineage leukemia (MLL) leukemias. Unlike other MLL translocations, MLL-AF4-induced proB-ALL is exceptionally difficult to model in mice/humans. Previous work has investigated the relevance of the reciprocal translocation fusion protein AF4-MLL for t(4;11) leukemia, finding that AF4-MLL is capable of inducing proB-ALL without requirement for MLL-AF4 when expressed in murine hematopoietic stem/progenitor cells (HSPCs). Therefore, AF4-MLL might represent a key genetic lesion contributing to t(4;11)-driven leukemogenesis. Here, we aimed to establish a humanized mouse model by using AF4-MLL to analyze its transformation potential in human cord blood-derived CD34<sup>+</sup> HSPCs. We show that AF4-MLL-expressing human CD34<sup>+</sup> HSPCs provide enhanced long-term hematopoietic reconstitution in primary immunodeficient recipients but are not endowed with subsequent self-renewal ability upon serial transplantation. Importantly, expression of AF4-MLL in primary neonatal CD34<sup>+</sup> HSPCs failed to render any phenotypic or hematological sign of disease, and was therefore not sufficient to initiate leukemia within a 36-week follow-up. Species-specific (epi)-genetic intrinsic determinants may underlie the different outcome observed when AF4-MLL is expressed in murine or human HSPCs.

## INTRODUCTION

The translocation t(4;11)(q21;q23) encodes the chimeric proteins mixed-lineage leukemia (MLL)-AF4 and AF4-MLL and is the hallmark genetic abnormality associated with infant pro-B acute lymphoblastic leukemia (B-ALL), which has a dismal prognosis [1, 2]. Our understanding of t(4;11)-mediated transformation is limited, and unlike other MLL fusions, MLL-AF4-

induced leukemogenesis has been difficult to model. Current murine and humanized disease models do not faithfully recapitulate the pathogenesis/phenotype [3-5]. It has been claimed that the absence of a suitable t(4;11) disease model is the result of targeting a cell in a wrong developmental stage, or that the impact of secondary hits has not been properly addressed. Very recently, Lin *et al* [6] fused human MLL to murine Af4, resulting in a human-mouse chimeric fusion gene that produced high-titer retrovirus facilitating efficient transduction

of human CD34<sup>+</sup> cells, thereby generating the first “faithful” model of t(4;11) pro-B ALL recapitulating key immunophenotypic/molecular aspects of the disease.

Most chromosomal translocations that have been studied in cancer require only one fusion product for transformation, and in many human cancers the reciprocal fusion is not consistently expressed [7, 8]. The relevance of the reciprocal product AF4-MLL in t(4;11) leukemia has been investigated in previous studies. AF4-MLL fusion protein was capable of inducing B-ALL in mice without requirement of MLL-AF4, indicating that it might represent a key genetic lesion contributing to t(4;11)-driven leukemogenesis [5]. Here, we have investigated in a human stem cell context whether ectopic expression of *AF4-MLL* contributes to transform cord blood (CB)-derived CD34<sup>+</sup> HSPCs. Our data indicate that AF4-MLL transiently enhances long-term hematopoietic reconstitution in immunodeficient mice, but is not sufficient to initiate leukemia in primary neonatal CD34<sup>+</sup>HSPCs.

## RESULTS AND DISCUSSION

### Enforced expression of *AF4-MLL* in CB-derived CD34<sup>+</sup>HSPCs transiently augments multilineage hematopoietic engraftment and facilitates homing of CD34<sup>+</sup> HSPCs

To assess the developmental impact of AF4-MLL in human HSPCs, CB-derived CD34<sup>+</sup> cells were MACS-isolated (purity>95%) and transduced with a pRRL-lentivector expressing: (i) GFP reporter (EV), (ii) *MLL-AF4*-GFP and (iii) *AF4-MLL*-dTomato (Figure 1A-1B). Correct reporter (GFP, dTo) and transgene (*MLL-AF4* and *AF4-MLL*) expression in HSPCs was confirmed by flow cytometry (Figure 1C) and RT-PCR (Figure 1D) 3-5 days after transduction. Importantly, ectopic expression of AF4-MLL resulted in 2 to 4-fold upregulation of the master downstream effectors *HOXA9*, *MEIS1* and *RUNX1* (Figure 1E). To determine whether AF4-MLL regulates HSPCs *in vivo*, purified CD34<sup>+</sup> HSPCs were transduced with EV, MLL-AF4 or AF4-MLL, sorted based on reporter expression (Figure 1A) and 30, 000 cells were intra-bone marrow transplanted (IBMT) into irradiated (2.5 Gy) 8-10-week-old NSG mice ( $n = 45$ ). In two experiments 300, 000 infected CD34<sup>+</sup> HSPCs were transplanted without previous purification of transduced cells, rendering a similar outcome. Animals were monitored throughout the experiment and no mouse showed any sign of disease after 36 weeks. Enforced expression of *MLL* fusions, particularly *AF4-MLL*, enhanced hematopoietic engraftment 2- to 3-fold as compared with EV-transduced cells (25% in MLL-AF4 and 53% in AF4-MLL vs 16% in EV; Figure 1F), indicating that AF4-MLL sustains

robust engraftment. The ectopic expression of *MLL-AF4* and *AF4-MLL* was confirmed by RT-PCR in bone marrow (BM) cells derived from engrafted animals (Figure 1G). However, AF4-MLL failed to promote further self-renewal upon serial transplantation; the enhanced AF4-MLL-mediated hematopoietic reconstitution observed in primary recipients was transient, and was lost in secondary recipients ( $n = 12$  secondary mice from  $n = 4$  primary mice; Figure 1F).

IBMT provides the opportunity to assess migration of transplanted CD34<sup>+</sup> cells *in vivo*. Accordingly, the migration ability of transplanted EV-, MLL-AF4- and AF4-MLL-CD34<sup>+</sup> cells was assessed by analyzing the level of chimerism in injected tibiae (IT), non-injected tibia (contralateral, CL), spleen and peripheral blood (PB). CD34<sup>+</sup> HSPCs were capable of migrating to and colonizing other hematopoietic sites in all the animals (Figure 1H). However, the levels of chimerism in CL and PB were 2-fold higher in NSG mice transplanted with *AF4-MLL*-transduced CD34<sup>+</sup> cells. Thus, enforced expression of *AF4-MLL* transiently augments multilineage hematopoietic engraftment and facilitates homing of CD34<sup>+</sup> HSPCs.

### Expression of *AF4-MLL* in CB-derived CD34<sup>+</sup> HSPCs fails to initiate leukemogenesis *in vivo*

We next characterized the composition of the human graft by FACS (Figure 2A, Supplementary Figure 1). Similar multilineage repopulation was always observed in all engrafted mice, irrespective of the expression of *MLL-AF4* or *AF4-MLL* and the tissue analyzed (Figure 2B, Supplementary Figure S1). The graft was consistently lymphoid-biased (CD45<sup>+</sup>CD19<sup>+</sup>;~60%), followed by CD45<sup>+</sup>CD33<sup>+</sup> myeloid cells (~40%) and CD45<sup>+</sup>CD34<sup>+</sup> immature cells (~10%) (Figure 2B1). Because leukemic blasts in t(4;11)<sup>+</sup> B-ALL are characterized by a CD34<sup>+</sup>CD19<sup>+</sup>CD10<sup>-</sup> pro-B phenotype, we further analyzed the phenotype of the CD45<sup>+</sup>CD19<sup>+</sup> B-cell graft and found that ~25% was composed by pro-B cells and mature B-cells (CD19<sup>+</sup>CD10<sup>-</sup>) coexisting with a predominant pre-B cell population (CD19<sup>+</sup>CD10<sup>+</sup>CD34<sup>+</sup>;~75%) (Figure 2C). Similarly, the engraftment of CD34<sup>+</sup> immature cells was predominantly myeloid (CD33<sup>+</sup>) in mice transplanted with EV- or AF4-MLL-transduced CD34<sup>+</sup> cells (Figure 2D). A comparable engraftment composition was observed in a cohort ( $n = 3$ ) of animals sacrificed 12 weeks post-transplantation (Supplementary Figure 2). Thus, normal (non-leukemic) B-cell development and engraftment kinetics were observed in mice transplanted with EV, MLL-AF4 and AF4-MLL CD34<sup>+</sup> cells.

To further confirm that AF4-MLL did not contribute to leukemia initiation, all the animals lacking disease signals after 36 weeks were sacrificed, and neither splenomegaly (Figure 2E, left panel) nor hepatomegaly

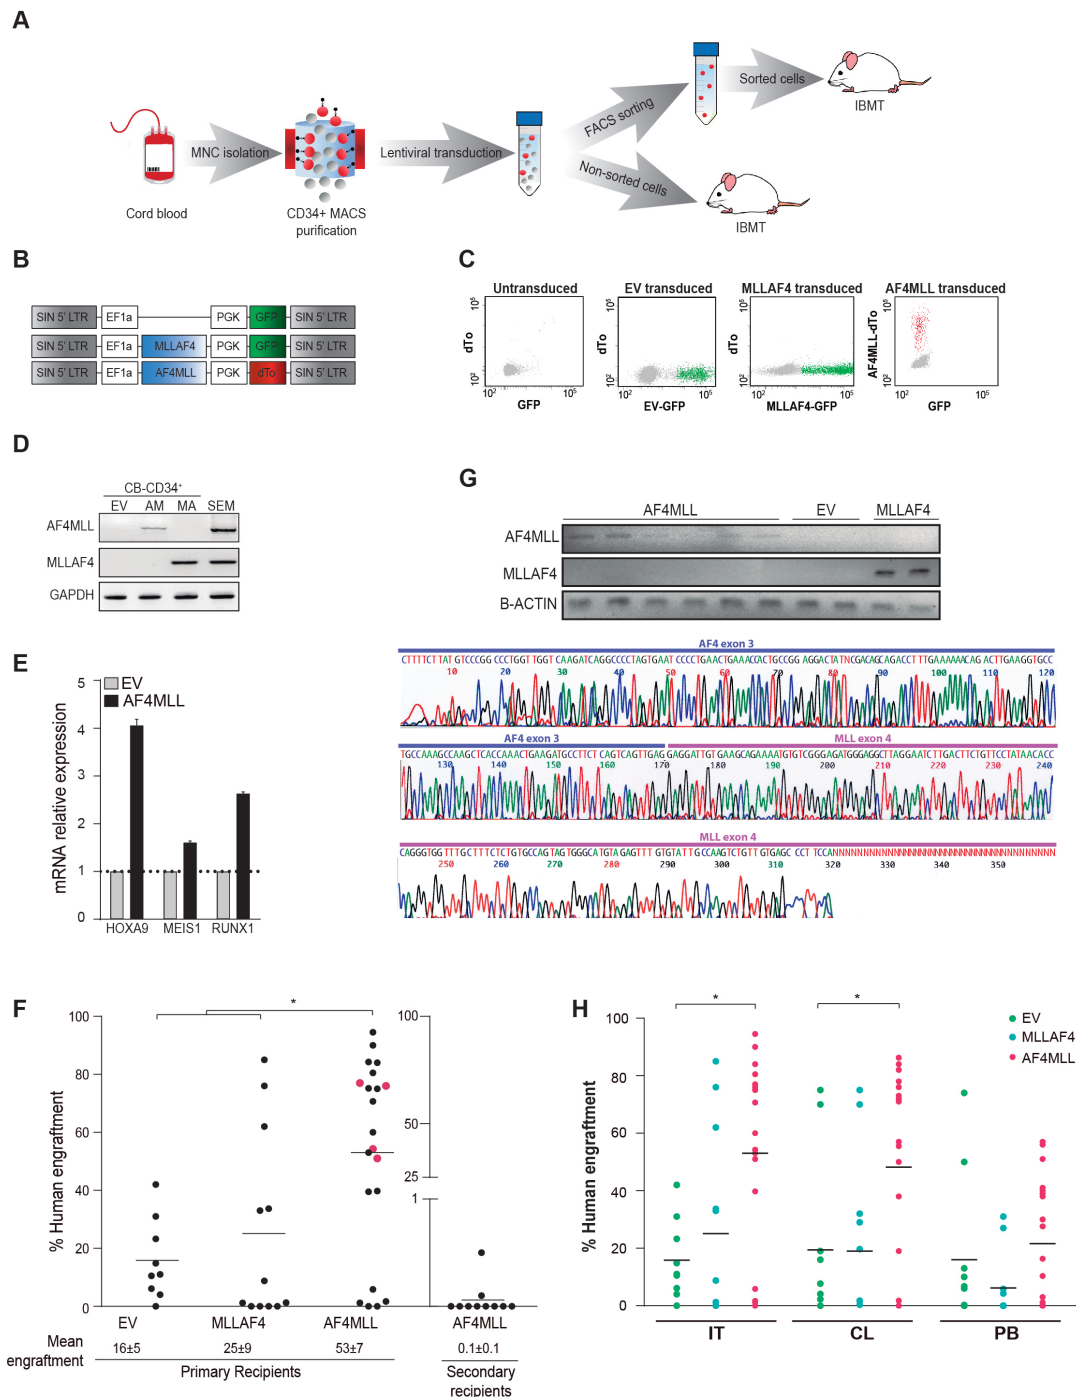

**Figure 1: Expression of *AF4-MLL* enhances hematopoietic engraftment of CB-CD34<sup>+</sup> HSPCs.** **A.** Outline of the experimental design. **B.** Schematic representation of the lentivectors used. *AF4-MLL* and *MLL-AF4* vectors express dTomato and GFP, respectively, as reporter. **C.** Representative flow cytometry plots showing FACS purification of transduced cells: GFP<sup>+</sup> cells (green) in *MLL-AF4*-transduced, dTo<sup>+</sup> cells (red) in *AF4-MLL*-transduced CD34<sup>+</sup> HSPCs. Mock-transduced cells (left panel) were used as a reference control. **D.** RT-PCR confirming ectopic expression of *AF4-MLL* and *MLL-AF4* in transduced CB-CD34<sup>+</sup> cells. **E.** RT-qPCR confirming upregulation of the *AF4-MLL* downstream effectors *HOXA9*, *MEIS1* and *RUNX1* in transduced cells. **F.** Levels of long-term (36 weeks) hematopoietic engraftment of CB-CD34<sup>+</sup> expressing *AF4-MLL* or *MLL-AF4* ( $n = 42$  mice). Note the very limited hematopoietic engraftment of *AF4-MLL*-expressing CB-CD34<sup>+</sup> upon serial (secondary) xenotransplantation ( $n = 12$  mice from 4 independent experiments corresponding to primografts shown in pink). **G.** *Upper panel:* RT-PCR confirming stable ectopic expression of *AF4-MLL* and *MLL-AF4* in xenografts recovered 36 weeks after transplantation. *Lower panel:* Sanger sequencing verifying the *AF4-MLL* PCR product. **H.** Hematopoietic engraftment in the injected tibia (IT), the contralateral (CL) tibia and the PB of EV, *MLL-AF4* and *AF4-MLL* primografts 36 weeks after transplantation. MNC: Mononuclear cells; EV: Empty vector; IBMT: Intra-bone marrow transplantation.

was particularly associated with the AF4-MLL genotype. Moreover, platelet counts, hemoglobin levels and leukocyte counts (WBC) were normal/similar between conditions (Figure 2E, middle-right panels). Importantly, secondary recipients of primary mice engrafted with

AF4-MLL-expressing CD34<sup>+</sup> cells had no sign of splenomegaly, anemia or leukocytosis according to the limited engraftment observed upon serial transplantation (Figure 2E). Collectively, the results show that enforced expression of *AF4-MLL* (or *MLL-AF4*) was not sufficient

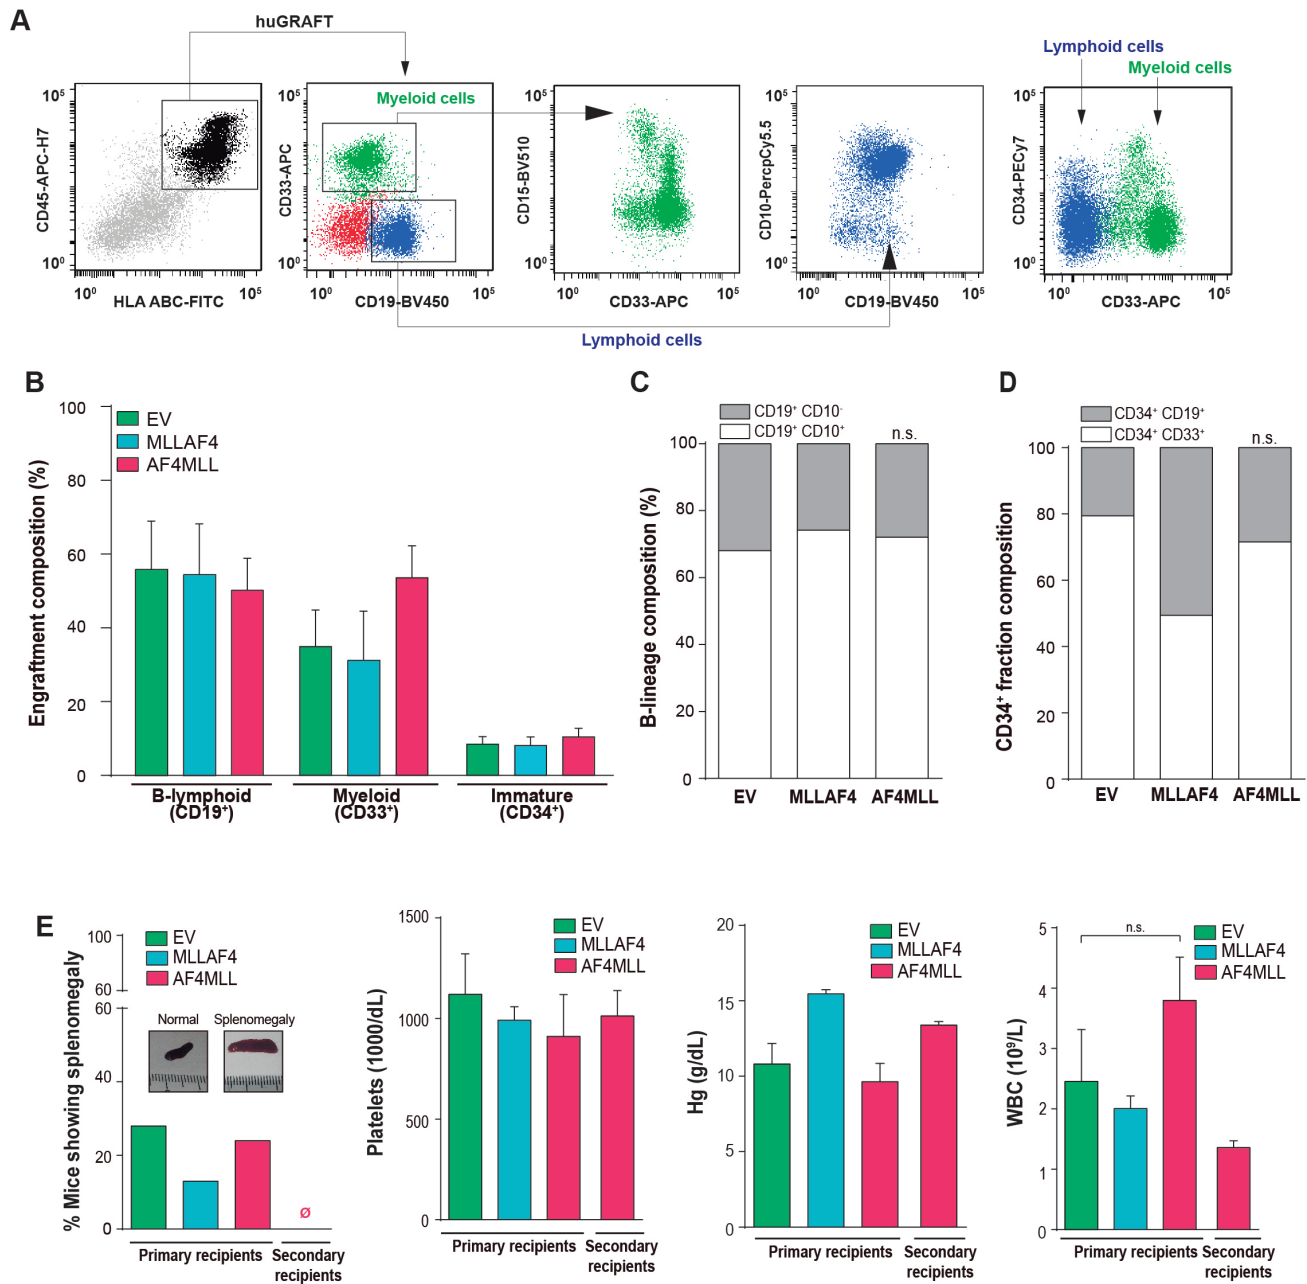

**Figure 2: *AF4-MLL* is not sufficient to initiate leukemia in CB-CD34<sup>+</sup> HSPCs.** **A.** Representative flow cytometry analysis of chimeric mice. Human engraftment (black) is identified as HLA.ABC<sup>+</sup> CD45<sup>+</sup> and includes lymphoid CD19<sup>+</sup> cells (blue), comprising pre-B (CD10<sup>+</sup>) and pro-B (CD10<sup>-</sup>) fractions, myeloid CD33<sup>+</sup>/CD15<sup>-</sup> or CD33<sup>+</sup>/CD15<sup>+</sup> cells (green) and CD34<sup>+</sup> immature cells (either lymphoid- (CD19<sup>+</sup>) or myeloid-committed (CD33<sup>+</sup>)). **B.** Graft composition confirming normal multilineage engraftment in primografts. **C.** CD19<sup>+</sup> graft analysis demonstrating normal, non-leukemic pro-B (CD10<sup>-</sup>) to pre-B (CD10<sup>+</sup>) B cell differentiation. **D.** Normal engraftment composition of the immature CD34<sup>+</sup> fraction including B cell progenitors (CD34<sup>+</sup>CD19<sup>+</sup>; 55-80%) and myeloid progenitors (CD34<sup>+</sup>CD33<sup>+</sup>; 20-45%) (*n* = 42 mice). **E.** *Left panel*, percentage of primografts showing splenomegaly (spleen weight >0.1g) within the indicated genotypes (*n* = 56). Macroscopic images comparing normal vs enlarged spleens are shown. *Middle-right panels*, platelet, hemoglobin and WBC counts analyzed in the indicated primary and secondary recipients, revealing no sign of leukemia in reconstituted mice.

for leukemogenesis.

We acknowledge some limitations in our study. First, the *AF4-MLL* fusion is 8 kb in length, so the expressing lentivector may produce low viral titers. Our *AF4-MLL*-expressing lentivirus titer was consistently ~10<sup>6</sup> infective particles, which suffices to infect target cells at a reasonable MOI, rendering stable transcript expression (sequenced) *in vitro* (Figure 1C, 1D) and *in vivo* (Figure 1G) even 36 weeks after transplantation. The same transcript was successfully expressed in a “safe harbor” [12] using CRISPR/Cas9 genome-editing, suggesting that the inability of *AF4-MLL* to initiate leukemia may not be attributed to the absence of transcript expression. Second, it is plausible that co-expression of *MLL-AF4* and *AF4-MLL* is required in the same target cell for leukemia initiation. Lentiviral expression of both cassettes in the same CD34<sup>+</sup> HSPC is challenging, but a CRISPR/Cas9-mediated recreation of the t(4;11) by producing both allele-specific *MLL* fusions would undoubtedly open new avenues in future research [13]. Alternatively, the generation of an *AF4-MLL* knock-in mouse, where *AF4-MLL* is conditionally expressed in the context of the *AF4* locus, could be a valuable model to test whether *AF4-MLL* is needed for leukemia onset. Arguments in favor for the need for *AF4-MLL* are: (i) the extreme rapid onset of disease after birth; the existing mouse data with *AF4-MLL* alone [5] and its proposed function [14]. Arguments against the need for *AF4-MLL* to be co-expressed with *MLL-AF4* for B-ALL initiation are: (i) at least one third of t(4;11)<sup>+</sup> patients display complex genetic rearrangements and do not express particularly *AF4-MLL* [15, 16]; (ii) ablation of *AF4-MLL* in leukemic cell lines seems dispensable for cell growth in short term siRNA experiments [14]. Therefore, *AF4-MLL* may well cooperate with *MLL-AF4* in leukemia phenotype, aggressiveness or therapy-resistance rather than in leukemia onset/initiation.

## MATERIALS AND METHODS

The study was IRB-approved by the Clinic Hospital of Barcelona and CB units from healthy newborns were accessed from the Barcelona Cord Blood Bank upon signed informed consent.

MACS enrichment of CD34<sup>+</sup> HSPCs, lentiviral-mediated transduction of *MLL-AF4* and *AF4-MLL*, reporter-based FACS-isolation of transduced cells, serial intra-bone marrow xenotransplantation (IBMT), mouse follow-up, flow cytometric analysis of multi-lineage/multi-organ chimerism, RT-PCR (conditions and primers), and assessment of hematological parameters were done as previously described by our group and others [5, 9-12, 15, 16]. The *AF4-MLL* fusion cloned in the pRRL lentivector (pRRL-EF1a-*AF4-MLL*-PGK-dTo) was sequenced as shown in Supplementary Figure 3, which highlights the breakpoint and the start/stop codons.

## Ethics approval and consent to participate

All animal procedures were approved by the local ethical committee (Comité Ético de Experimentación Animal del PRBB (CEEAA-PRBB); procedure numbers MDS-08-1060P1 and JMC-07-1001P1-MDS), and met the guidelines of the local (law 32/2007) and European regulations (EU directive n° 86/609, EU decree 2001-486) and the Standards for Use of Laboratory Animals n° A5388-01 (NIH).

## Abbreviations

HSPCs: Hematopoietic Stem and Progenitor Cells, *MLL*: Mixed lineage leukemia, B-ALL: Pro-B Acute Lymphoblastic Leukemia, MACS: magnetic activated cell sorting, FACS: fluorescence activated cell sorting, IBMT: intra-bone marrow transplantation, CB: cord blood, EV: empty vector, IT: injected tibiae, CL: contralateral, PB: peripheral blood.

## Author’s contributions

C.P conceived the study, designed and performed experiments, analyzed and plotted the data and wrote the manuscript. R.M, A.K. and H.B. conceived the study, performed experiments and analyzed data. C.B and P.M conceived the study, designed experiments, analyzed data and wrote the manuscript.

## CONFLICTS OF INTERESTS

The authors have nothing to disclose.

## FUNDING

This work was supported by the European Research Council (CoG-2014-646903) to P.M, the Spanish Ministry of Economy-Competitiveness (SAF-SAF2013-43065) to P.M, the Asociación Española Contra el Cáncer (AECC-CI-2015) to C.B, and the ISCIII/FEDER (PI14/01191) to C.B, and the Deutsche José Carreras Leukämie Stiftung to R.M/P.M. P.M also acknowledges the financial support from the Obra Social La Caixa-Fundació Josep Carreras, the Inocente-Inocente Foundation and Generalitat de Catalunya. C.P was funded by a PFIS scholarship from the ISCIII. P.M is investigator of the Spanish Cell Therapy cooperative network (TERCEL).

## Editorial note

This paper has been accepted based in part on peer-review conducted by another journal and the authors’

response and revisions as well as expedited peer-review in Oncotarget.

## REFERENCES

1. Macmahon B, Levy MA. Prenatal Origin of Childhood Leukemia. Evidence from Twins. *N Engl J Med.* 1964; 270: 1082-1085.
2. Gale KB, Ford AM, Repp R, Borkhardt A, Keller C, Eden OB, Greaves MF. Backtracking leukemia to birth: identification of clonotypic gene fusion sequences in neonatal blood spots. *Proc Natl Acad Sci U S A.* 1997; 94: 13950-13954.
3. Metzler M, Forster A, Pannell R, Arends MJ, Daser A, Lobato MN, Rabbits TH. A conditional model of MLL-AF4 B-cell tumorigenesis using invertebrate technology. *Oncogene.* 2006; 25: 3093-3103.
4. Krivtsov AV, Feng Z, Lemieux ME, Faber J, Vempati S, Sinha AU, Xia X, Jesneck J, Bracken AP, Silverman LB, Kutok JL, Kung AL, Armstrong SA. H3K79 methylation profiles define murine and human MLL-AF4 leukemias. *Cancer Cell.* 2008; 14: 355-368.
5. Bursen A, Schwabe K, Ruster B, Henschler R, Ruthardt M, Dingermann T, Marschalek R. The AF4.MLL fusion protein is capable of inducing ALL in mice without requirement of MLL.AF4. *Blood.* 2010; 115: 3570-3579.
6. Lin S, Luo RT, Ptasinska A, Kerry J, Assi SA, Wunderlich M, Imamura T, Kaberlein JJ, Rayes A, Althoff MJ, Anastasi J, O'Brien MM, Meetei AR, et al. Instructive Role of MLL-Fusion Proteins Revealed by a Model of t(4;11) Pro-B Acute Lymphoblastic Leukemia. *Cancer Cell.* 2016; 30: 737-749.
7. Wilkinson AC, Ballabio E, Geng H, North P, Tapia M, Kerry J, Imamura T, Kaberlein JJ, Rayes A, Althoff MJ, Anastasi J, O'Brien MM, Meetei AR, et al. RUNX1 is a key target in t(4;11) leukemias that contributes to gene activation through an AF4-MLL complex interaction. *Cell Rep.* 2013; 3: 116-127.
8. Rego EM, Pandolfi PP. Reciprocal products of chromosomal translocations in human cancer pathogenesis: key players or innocent bystanders? *Trends Mol Med.* 2002; 8: 396-405.
9. Montes R, Ayllon V, Gutierrez-Aranda I, Prat I, Hernandez-Lamas MC, Ponce L, Bresolin S, Te Kronnie G, Greaves M, Bueno C, Menendez P. Enforced expression of MLL-AF4 fusion in cord blood CD34+ cells enhances the hematopoietic repopulating cell function and clonogenic potential but is not sufficient to initiate leukemia. *Blood.* 2011; 117: 4746-4758.
10. Montes R, Ayllon V, Prieto C, Bursen A, Prella C, Romero-Moya D, Real PJ, Navarro-Montero O, Chillon C, Marschalek R, Bueno C, Menendez P. Ligand-independent FLT3 activation does not cooperate with MLL-AF4 to immortalize/transform cord blood CD34+ cells. *Leukemia.* 2014;28: 666-674.
11. Prieto C, Stam RW, Agraz-Doblas A, Ballerini P, Camos M, Castano J, Marschalek R, Bursen A, Varela I, Bueno C, Menendez P. Activated KRAS Cooperates with MLL-AF4 to Promote Extramedullary Engraftment and Migration of Cord Blood CD34+ HSPC But Is Insufficient to Initiate Leukemia. *Cancer Res.* 2016; 76: 2478-2489.
12. Castano J, Herrero AB, Bursen A, Gonzalez F, Marschalek R, Gutierrez NC, Menendez P. Expression of MLL-AF4 or AF4-MLL fusions does not impact the efficiency of DNA damage repair. *Oncotarget.* 2016; 7: 30440-30452. <https://doi.org/10.18632/oncotarget.8938>.
13. Breese EH, Buechele C, Dawson C, Cleary ML, Porteus MH. Use of Genome Engineering to Create Patient Specific MLL Translocations in Primary Human Hematopoietic Stem and Progenitor Cells. *PLoS one.* 2015; 10: e0136644.
14. Kumar AR, Yao Q, Li Q, Sam TA, Kersey JH. t(4;11) leukemias display addiction to MLL-AF4 but not to AF4-MLL. *Leuk Res.* 2011; 35: 305-309.
15. Muñoz-López A, Romero-Moya D, Prieto C, Ramos-Mejía V, Agraz-Doblas A, Varela I, Buschbeck M, Palau A, Carvajal-Vergara X, Giorgetti A, Ford A, Lako M, Granada I, et al. Development Refractoriness of MLL-Rearranged Human B Cell Acute Leukemias to Reprogramming into Pluripotency. *Stem Cell Reports.* 2016;7:602-618.
16. Sanjuan-Pla A, Romero-Moya D, Prieto C, Bueno C, Bigas A, Menendez P. Intra-Bone Marrow Transplantation Confers Superior Multilineage Engraftment of Murine Aorta-Gonad Mesonephros Cells Over Intravenous Transplantation. *Stem Cells Dev.* 2016;25:259-65.
