# Supplementary material for: The AF4-MLL fusion transiently augments multilineage hematopoietic engraftment but is not sufficient to initiate leukemia in cord blood CD34+ cells
Source: PubMed Central journal article supplement (PMC5669860; doi:10.18632/oncotarget.19567), 2017-07-26
Supplement: oncotarget-08-81936-s001.pdf [file oncotarget-08-81936-s001.pdf]

## The AF4-MLL fusion transiently augments multilineage hematopoietic engraftment but is not sufficient to initiate leukemia in cord blood CD34<sup>+</sup> cells

### SUPPLEMENTARY MATERIALS

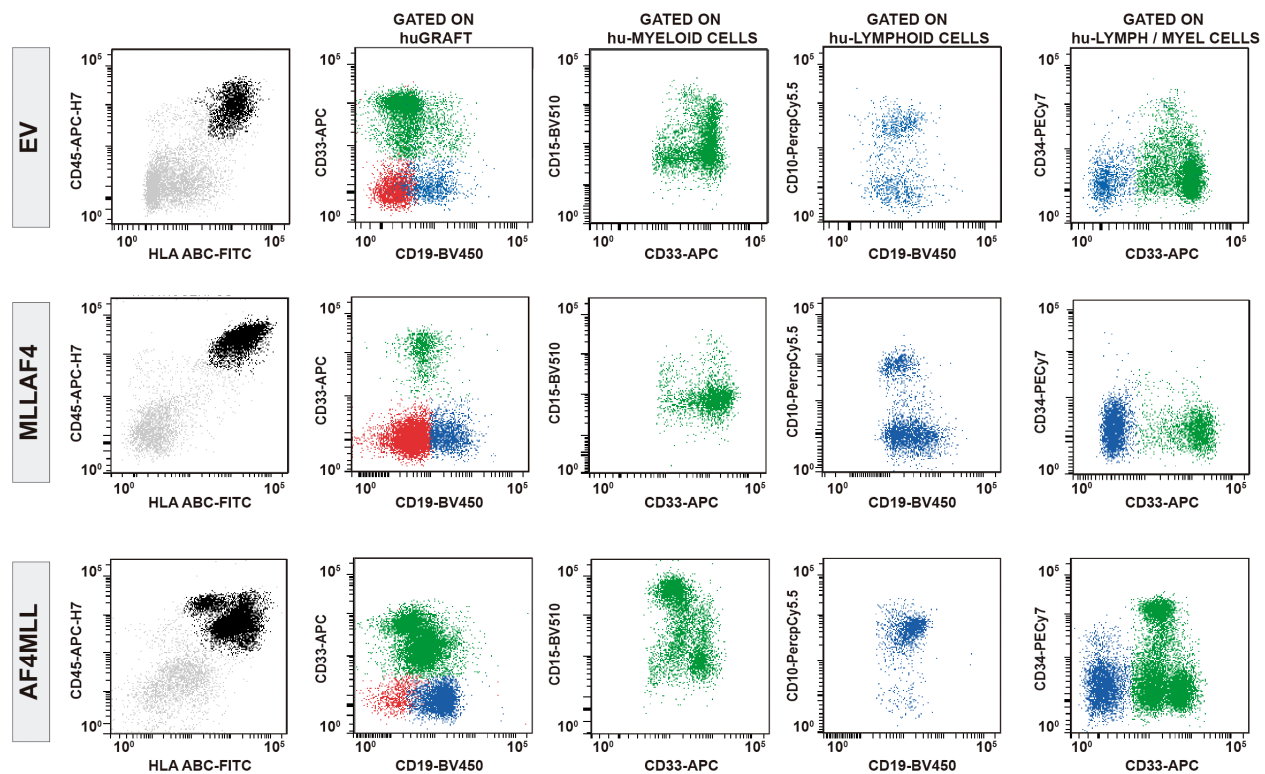

**Supplementary Figure 1: Representative flow cytometry analysis of mice transplanted with EV-, MLL-AF4- or AF4-MLL-expressing CD34<sup>+</sup> HSPCs.** Human engraftment (black) is identified as HLA.ABC<sup>+</sup> CD45<sup>+</sup> and includes lymphoid CD19<sup>+</sup> cells (blue), comprising pre-B (CD10<sup>+</sup>) and pro-B (CD10<sup>-</sup>) fractions, myeloid CD33<sup>+</sup>/CD15<sup>-</sup> and CD33<sup>+</sup>/CD15<sup>+</sup> cells (green) and a few CD34<sup>+</sup> immature cells (either lymphoid- (CD19<sup>+</sup>) or myeloid-committed (CD33<sup>+</sup>)).

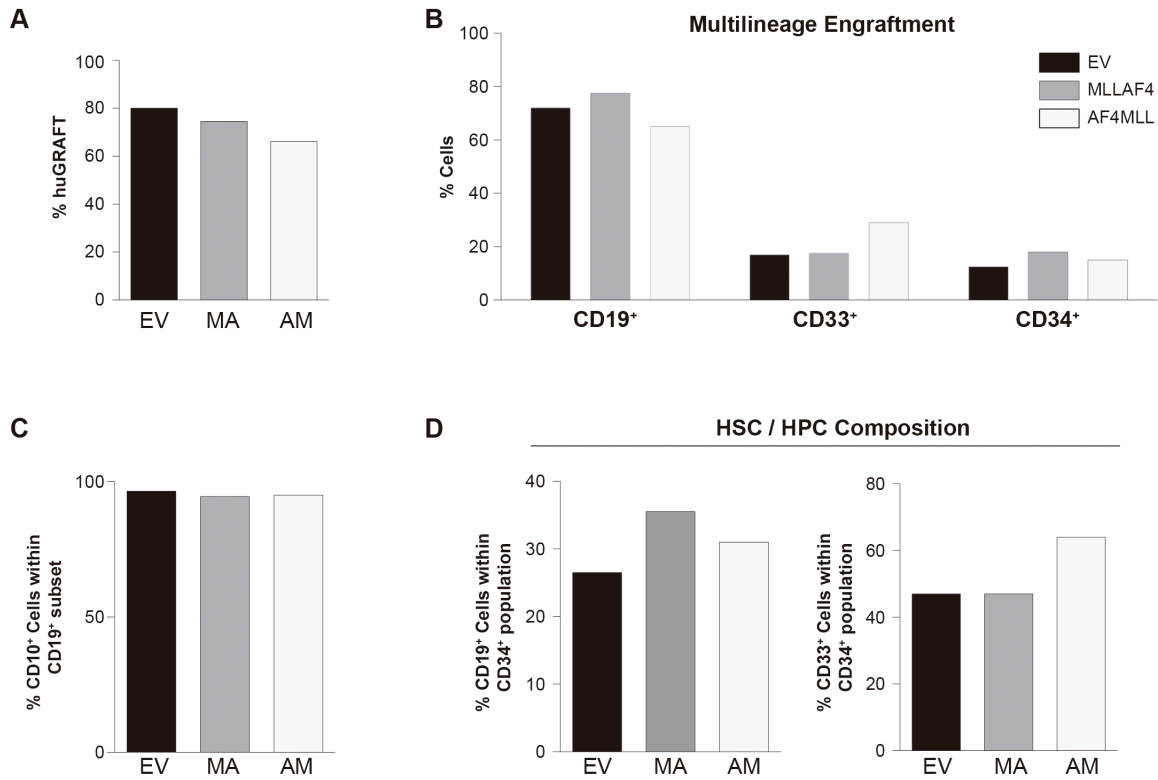

**Supplementary Figure 2: Twelve-week engraftment composition of mice transplanted with EV-, MLL-AF4- or AF4-MLL-expressing CD34<sup>+</sup> HSPCs.** (A) Total engraftment identified as HLA.ABC<sup>+</sup> CD45<sup>+</sup>. (B) Multilineage engraftment including CD19<sup>+</sup> B-lymphoid, CD33<sup>+</sup> myeloid and CD34<sup>+</sup> immature engraftment. (C) Proportion of CD10<sup>+</sup> pre-B cells within the CD19<sup>+</sup> B-lymphoid engraftment. (D) Proportion of CD19<sup>+</sup> (Band CD33<sup>+</sup> cells within the CD34<sup>+</sup> immature engraftment).

## AF4-MLL (8739 bp)

Red: AF4 exon 1+AF4 exon 2

Blue: MLL exon 10 to 36

**ATG** :Start Codon

**TAA** :Stop Codon

**ATG**GCAGCCCAGTCAAGTTTGTACAATGACGACAGAAACCTGCTTCGAATTAG  
AGAGAAGGAAAGACGCAACCAGGAAGCCCACCAAGAGAAAGAGGCATTTCT  
GAAAAGATTCCCCTTTTTGGAGAGCCCTACAAGACAGCAAAGGTGATGAGCT  
GTCTAGTCGAATACAGAACATGTTGGGAAACTACGAAGAAGTGAAGGAGTTC  
CTTAGTACTAAGTCTCACACTCATCGCCTGGATGCTTCTGAAAATAGGTTGGG  
AAAGCCGAAATATCCTTTAATTCCTGACAAAGGGAGCAGCATTCCATCCAGCT  
CCTTCCACACTAGTGTCCACCACCAGTCCATTCACACTCCTGCGTCTGGACCA  
CTTTCTGTTGGCAACATTAGCCACAATCCAAAGATGGCGCAGCCAAGAACTGA  
ACCAATGCCAAGTCTCCATGCCAAAAGCTGCGGCCACCGGACAGCCAGCAC  
CTGACCCAGGATCGCCTTGGTCAGGAGGGGTTTCGGCTCTAGTCATCACAAGA  
AAGGTGACCGAAGAGCTGACGGAGACCACTGTGCTTCGGTGACAGATTCCG  
CTCCAGAGAGGGAGCTTTCTCCCTTAATCTCTTTGCCTTCCCCAGTTCCCCCT  
TTGTCACCTATACATTCCAACCAGCAAACCTTCCCCGGACGCAAGGAAGCAG  
CAAGGTTTCATGGCAGCAGCAATAACAGTAAAGGCTATTGCCAGCCAATCTC  
CCAAGGACCTAGCAGTGAAAGTCCATGATAAAGAGACCCCTCAAGACAGTTT  
GGTGGCCCCTGCCAGCCGCCTTCTCAGACATTTCCACCTCCCTCCCTCCCC  
TCAAAAAGTGTTGCAATGCAGCAGAAGCCCACGGCTTATGTCCGGCCCATGG  
ATGGTCAAGATCAGGCCCTAGTGAATCCCCTGAACTGAAACCACTGCCGGA  
GGACTATCGACAGCAGACCTTTGAAAAACAGACTTGAAAGTGCCTGCCAAA  
GCCAAGCTCACCAAACCTGAAGATGCCTTCTCAGTCAGTTGAGGAGGATTGTG  
AAGCAGAAAATGTGTGGGAGATGGGAGGCTTAGGAATCTTGACTTCTGTTCT  
ATAACACCCAGGGTGGTTTGTCTTCTGTGCCAGTAGTGGGCATGTAGAGTT  
TGTGTATTGCCAAGTCTGTTGTGAGCCCTTCCACAAGTTTTGTTTAGAGGAGA  
ACGAGCGCCCTCTGGAGGACCAGCTGGAAAATTGGTGTGTCGTCGTTGCAA  
ATTCTGTACGTTTGTGGAAGGCAACATCAGGCTACAAAGCAGCTGCTGGAG  
TGTAATAAGTGCCGAAACAGCTATCACCTGAGTGCCTGGGACCAAACCTACC  
CCACCAAACCCACAAAGAAGAAGAAAGTCTGGATCTGTACCAAGTGTGTTCCG  
CTGTAAGAGCTGTGGATCCACAACCTCCAGGCAAAGGGTGGGATGCACAGTGG  
TCTCATGATTTCTCACTGTGTCATGATTGCGCCAAGCTCTTTGCTAAAGGAAA  
CTTCTGCCCTCTCTGTGACAAATGTTATGATGATGACTATGAGAGTAAGA  
TGATGCAATGTGGAAAGTGTGATCGCTGGGTCCATTCCAAATGTGAGAATCTT  
TCAGGTACAGAAGATGAGATGTATGAGATTCTATCTAATCTGCCAGAAAGTGT  
GGCCTACACTTGTGTGAACTGTAAGTACTGAGCGGCACCCTGCAGAGTGGCGACTG  
GCCCTTAAAAAGAGCTGCAGATTTCTCTGAAGCAAGTTCTGACAGCTTTGTT  
GAATTCTCGGACTACCAGCCATTTGCTACGCTACCGGCAGGCTGCCAAGCCT

CCAGACTTAAATCCCGAGACAGAGGAGAGTATACCTTCCCGCAGCTCCCCCG  
AAGGACCTGATCCACCAGTTCTTACTGAGGTCAGCAAACAGGATGATCAGCA  
GCCTTTAGATCTAGAAGGAGTCAAGAGGAAGATGGACCAAGGGAATTACACA  
TCTGTGTTGGAGTTCAGTGATGATATTGTGAAGATCATTCAAGCAGCCATTAAT  
TCAGATGGAGGACAGCCAGAAATTA AAAAAGCCAACAGCATGGTCAAGTCCTT  
CTTCATTCCGGCAAATGGAACGTGTTTTTCCATGGTTCAGTGTCAAAAAGTCCA  
GGTTTTGGGAGCCAAATAAAGTATCAAGCAACAGTGGGATGTTACCAAACGCA  
GTGCTTCCACCTTCACTTGACCATAATTATGCTCAGTGGCAGGAGCGAGAGG  
AAAACAGCCACACTGAGCAGCCTCCTTTAATGAAGAAAATCATTCCAGCTCCC  
AAACCCAAAGGTCCTGGAGAACCAGACTCACCAACTCCTCTGCATCCTCCTAC  
ACCACCAATTTTGAGTACTGATAGGAGTCGAGAAGACAGTCCAGAGCTGAAC  
CCACCCCCAGGCATAGAAGACAATAGACAGTGTGCGTTATGTTTGACTTATGG  
TGATGACAGTGCTAATGATGCTGGTTCGTTTACTATATATTGGCCAAAATGAGT  
GGACACATGTAAATTGTGCTTTGTGGTCAGCGGAAGTGTGTTGAAGATGATGAC  
GGATCACTAAAGAATGTGCATATGGCTGTGATCAGGGGCAAGCAGCTGAGAT  
GTGAATTCTGCCAAAAGCCAGGAGCCACCGTGGGTTGCTGTCTCACATCCTG  
CACCAGCAACTATCACTTCATGTGTTCCCGAGCCAAGAAGTGTGTCTTTCTGG  
ATGATAAAAAAGTATATTGCCAACGACATCGGGATTTGATCAAAGGCGAAGTG  
GTTCTGAGAATGGATTTGAAGTTTTCAGAAGAGTGTGTTGTGGACTTTGAAGG  
AATCAGCTTGAGAAGGAAGTTTCTCAATGGCTTGGAACCAGAAAATATCCACA  
TGATGATTGGGTCTATGACAATCGACTGCTTAGGAATTCTAAATGATCTCTCC  
GACTGTGAAGATAAGCTCTTTCCTATTGGATATCAGTGTTCAGGGTATACTG  
GAGCACCACAGATGCTCGCAAGCGCTGTGTATATACATGCAAGATAGTGGAG  
TGCCGTCCTCCAGTCGTAGAGCCGGATATCAACAGCACTGTTGAACATGATG  
AAAACAGGACCATTGCCCATAGTCCAACATCTTTTACAGAAAAGTTCATCAAAA  
GAGAGTCAAACACAGCTGAAATTATAAGTCTCCATCACCCAGACCGACCTCC  
TCATTACAAACCTCTGGCTCCTGTTATTATCATGTCATCTCAAAGGTCCCCAG  
GATTCGAACACCCAGTTATTCTCCAACACAGAGATCCCCTGGCTGTCGACCGT  
TGCCTTCTGCAGGAAGTCCTACCCCAACCACTCATGAAATAGTCACAGTAGGT  
GATCCTTTACTCTCCTCTGGACTTCGAAGCATTGGCTCCAGGCGTCACAGTAC  
CTCTTCTTATCACCCAGCGGTCCAAACTCCGGATAATGTCTCCAATGAGAA  
CTGGGAATACTTACTCTAGGAATAATGTTTCCTCAGTCTCCACCACCGGGACC  
GCTACTGATCTTGAATCAAGTGCCAAAGTAGTTGATCATGTCTTAGGGCCACT  
GAATTCAAGTACTAGTTTtagggCAAACACTTCCACCTCTTCAAATTTGCAAAG  
GACAGTGGTACTGTAGGCAATAAAAACAGTCACTTGGATGGATCTTCATCTT  
CAGAAATGAAGCAGTCCAGTGCTTCAGACTTGGTGTCCAAGAGCTCCTCTTTA  
AAGGGAGAGAAGACCAAAGTGCTGAGTTCCAAGAGCTCAGAGGGATCTGCAC  
ATAATGTGGCTTACCCTGGAATTCCTAAACTGGCCCCACAGGTTTCATAACACA  
ACATCTAGAGAAGTGAATGTTAGTAAAATCGGCTCCTTTGCTGAACCCTCTTC  
AGTGTCGTTTTCTTCTAAAGAGGCCCTCTCCTTCCCACACCTCCATTTGAGAG  
GGCAAAGGAATGATCGAGACCAACACACAGATTCTACCCAATCAGCAAACCTC  
CTCTCCAGATGAAGATACTGAAGTCAAACCTTGAAGCTATCTGGAATGAGCA  
ACAGATCATCCATTATCAACGAACATATGGGATCTAGTTCCAGAGATAGGAGA

CAGAAAGGGAAAAAATCCTGTAAAGAACTTTCAAAGAAAAGCATTCCAGTAA  
ATCTTTTTTGGAACCTGGTCAGGTGACAACCTGGTGAGGAAGGAACTTGAAGC  
CAGAGTTTATGGATGAGGTTTTGACTCCTGAGTATATGGGCCAACGACCATGT  
ACAATGTTTCTTCTGATAAGATTGGTGATAAAGGCCTTTCTATGCCAGGAGT  
CCCCAAAGCTCCACCCATGCAAGTAGAAGGATCTGCCAAGGAATTACAGGCA  
CCACGGAAACGCACAGTCAAAGTGACACTGACACCTCTAAAAATGGAAAATGA  
GAGTCAATCCAAAAATGCCCTGAAAGAAAAGTAGTCCTGCTTCCCCTTTGCAA  
TAGAGTCAACATCTCCACAGAACCAATTTACGCCTCTGAAAATCCAGGAGAT  
GGTCCAGTGGCCCAACCAAGCCCCAATAATACCTCATGCCAGGATTCTCAA  
GTAACAACATCAGAATCTTCCAGTACAGGACAGAAACCTAATGCTTCCAGAT  
GGCCCCAAACCTCAGGAGGATGGCTCTTTTAAAAGGAGGTATCCCCGTGCGA  
GTGCCCGTGCACGTTCTAACATGTTTTTTGGGCTTACCCCACTCTATGGAGTA  
AGATCCTATGGTGAAGAAGACATTCCATTCTACAGCAGCTCAACTGGGAAGAA  
GCGAGGCAAGAGATCAGCTGAAGGACAGGTGGATGGGGCCGATGACTTAAG  
CACTTCAGATGAAGACGACTTATACTATTACAACCTCACTAGAACAGTGATTC  
TTCAGGTGGAGAGGAACGACTGGCATCCCATAAATTTATTTGGGAGGAGGAA  
CAGTGTGATCTTCCAAAAATCTCACAGTTGGATGGTGTGATGATGGGACAGA  
GAGTGATACTAGTGTACAGCCACAACAAGGAAAAGCAGCCAGATTCCAAAA  
AGAAATGGTAAAGAAAATGGAACAGAGAACTTAAAGATTGATAGACCTGAAGA  
TGCTGGGGAGAAAGAACATGTCACTAAGAGTTCTGTTGGCCACAAAAATGAG  
CCAAAGATGGATAACTGCCATTCTGTAAGCAGAGTTAAAACACAGGGACAAGA  
TTCCTTGGAAGCTCAGCTCAGCTCATTGGAGTCAAGCCGCAGAGTCCACACA  
AGTACCCCTCCGACAAAAATTTACTGGACACCTATAATACTGAGCTCCTGAA  
ATCAGATTCAGACAATAACAACAGTGATGACTGTGGGAATATCCTGCCTTCAG  
ACATTATGGACTTTGTACTAAAGAATACTCCATCCATGCAGGCTTTGGGTGAG  
AGCCCAGAGTCATCTTCATCAGAACTCCTGAATCTTGGTGAAGGATTGGGTCT  
TGACAGTAATCGTGAAAAAGACATGGGTCTTTTTGAAGTATTTTCTCAGCAGCT  
GCCTACAACAGAACCTGTGGATAGTAGTGTCTCTTCTCTATCTCAGCAGAGG  
AACAGTTTGAGTTGCCTCTAGAGCTACCATCTGATCTGTCTGTCTTGACCACC  
CGGAGTCCCACTGTCCCCAGCCAGAATCCCAGTAGACTAGCTGTTATCTCAG  
ACTCAGGGGAGAAGAGAGTAACCATCACAGAAAAATCTGTAGCCTCCTCTGA  
AAGTGACCCAGCACTGCTGAGCCCAGGAGTAGATCCAACCTCTGAAGGCCAC  
ATGACTCCTGATCATTTTTATCCAAGGACACATGGATGCAGACCACATCTCTAG  
CCCTCCTTGTGGTTCAGTAGAGCAAGGTCATGGCAACAATCAGGATTTAACTA  
GGAACAGTAGCACCCCTGGCCTTCAGGTACCTGTTTCCCCAACTGTTCCCAT  
CCAGAACCAGAAGTATGTGCCCAATTCTACTGATAGTCCTGGCCCCGTCTCAGA  
TTTCCAATGCAGCTGTCCAGACCACTCCACCCACCTGAAGCCAGCCACTGA  
GAAACTCATAGTTGTTAACCAGAACATGCAGCCACTTTATGTTCTCCAACTCT  
TCCAAATGGAGTGACCCAAAAAATCCAATTGACCTCTTCTGTTAGTTCTACACC  
CAGTGTGATGGAGACAAATACTTCAGTATTGGGACCCATGGGAGGTGGTCTC  
ACCCTTACCACAGGACTAAATCCAAGCTTGCCAACCTTCTCAATCTTTGTTCCCT  
TCTGCTAGCAAAGGATTGCTACCCATGTCTCATCACCAGCACTTACATTCCTT  
CCCTGCAGCTACTCAAAGTAGTTTCCCACCAACATCAGCAATCCTCCTTCAG

GCCTGCTTATTGGGGTTCAGCCTCCTCCGGATCCCCAACTTTTGGTTTCAGAA  
TCCAGCCAGAGGACAGACCTCAGTACCACAGTAGCCACTCCATCCTCTGGAC  
TCAAGAAAAGACCCATATCTCGTCTACAGACCCGAAAGAATAAAAACTTGCT  
CCCTCTAGTACCCCTTCAAACATTGCCCTTCTGATGTGGTTTCTAATATGACA  
TTGATTAACCTTCACACCCTCCCAGCTTCCTAATCATCCAAGTCTGTTAGATTTG  
GGGTCACTTAATACTTCATCTCACCGAACTGTCCCCAACATCATAAAAAGATCT  
AAATCTAGCATCATGTATTTGAACCGGCACCCCTGTTACCACAGAGTGTGGG  
AGGAACTGCTGCCACAGCGGCAGGCACATCAACAATAAGCCAGGATACTAGC  
CACCTCACATCAGGGTCTGTGTCTGGCTTGGCATCCAGTTCCTCTGTCTTGAA  
TGTTGTATCCATGCAAACCTACCACAACCCCTACAAGTAGTGCGTCAGTTCAG  
GACACGTCACCTTAACCAACCCAAGGTTGCTTGGTACCCCAGATATTGGCTCA  
ATAAGCAATCTTTAATCAAAGCTAGCCAGCAGAGCCTGGGGATTTCAGGACCA  
GCCTGTGGCTTTACCGCCAAGTTCAGGAATGTTTCCACAACCTGGGGACATCA  
CAGACCCCTCTACTGCTGCAATAACAGCGGCATCTAGCATCTGTGTGCTCC  
CCTCCACTCAGACTACGGGCATAACAGCCGCTTCACCTTCTGGGGAAAGCAGA  
CGAACACTATCAGCTTCAGCATGTGAACCAGCTCCTTGCCAGCAAACTGGG  
ATTCATTCTTCCCAGCGTGATCTTGATTCTGCTTCAGGGCCCCAGGTATCCAA  
CTTTACCCAGACGGTAGACGCTCCTAATAGCATGGGACTGGAGCAGAACAAG  
GCTTTATCCTCAGCTGTGCAAGCCAGCCCCACCTCTCCTGGGGGTTCTCCAT  
CCTCTCCATCTTCTGGACAGCGGTGAGCAAGCCCTTCAGTGCCGGGTCCCAC  
TAAACCCAAACCAAAAACCAAACGGTTTCAGCTGCCTCTAGACAAAGGGAATG  
GCAAGAAGCACAATGTTTCCCATTTGCGGACCAGTTCTTCTGAAGCACACATT  
CCAGACCAAGAAACGACATCCCTGACCTCAGGCACAGGGACTCCAGGAGCA  
GAGGCTGAGCAGCAGGATACAGCTAGCGTGGAGCAGTCCTCCCAGAAGGAG  
TGTGGGCAACCTGCAGGGCAAGTCGCTGTTCTTCCGGAAGTTCAGGTGACCC  
AAAATCCAGCAAATGAACAAGAAAGTGCAAGAACCTAAAACAGTGGAAGAAGA  
GGAAAGTAATTTAGCTCCCCACTGATGCTTTGGCTTCAGCAAGAACAAAAGC  
GGAAGGAAAGCATTACTGAGAAAAACCCAAGAAAGGACTTGTTTTTGAATT  
TCCAGTGATGATGGCTTTCAGATCTGTGCAGAAAGTATTGAAGATGCCTGGAA  
GTCATTGACAGATAAAGTCCAGGAAGCTCGATCAAATGCCCGCCTAAAGCAG  
CTCTCATTGTCAGGTGTTAACGGTTTGGAGGATGCTGGGGATTCTCCATGATGC  
AGTTGTGTTCTCATTGAGCAGCTGTCTGGTGCCAAGCACTGTCGAAATTACA  
AATTCCGTTTCCACAAGCCAGAGGAGGCCAATGAACCCCCCTGAACCCTCA  
CGGCTCAGCCAGGGCTGAAGTCCACCTCAGGAAGTCAGCATTGACATGTTT  
AACTTCCTGGCTTCTAAACATCGTCAGCCTCCTGAATACAACCCCAATGATGA  
AGAAGAGGAGGAGGTACAGCTGAAGTCAGCTCGGAGGGCAACTAGCATGGA  
TCTGCCAATGCCATGCGCTTCCGGCACTTAAAAAAGACTTCTAAGGAGGCA  
GTTGGTGTCTACAGGTCTCCCATCCATGGCCGGGGTCTTTTCTGTAAGAGAAA  
CATTGATGCAGGTGAGATGGTGATTGAGTATGCCGGCAACGTCATCCGCTCC  
ATCCAGACTGACAAGCGGGAAAAGTATTACGACAGCAAGGGCATTGGTTGCT  
ATATGTTCCGAATTGATGACTCAGAGGTAGTGGATGCCACCATGCATGGAAAT  
GCTGCACGCTTCATCAATCACTCGTGTGAGCCTAACTGCTATTCTCGGGTCAT  
CAATATTGATGGGCAGAAGCACATTGTATCTTTGCCATGCGTAAGATCTACC

GAGGAGAGGAACTCACTTACGACTATAAGTTCCCCATTGAGGATGCCAGCAA  
CAAGCTGCCCTGCAACTGTGGCGCTAAGAAATGCCGGAAGTTCCTAAACTAA

**Supplementary Figure 3: primers sequences.**
